# Supplementary material for: Comparative RNA-seq Analysis in the Unsequenced Axolotl: The Oncogene Burst Highlights Early Gene Expression in the Blastema
Source: PLoS Comput Biol. 2013 Mar 7;9(3):e1002936. doi: 10.1371/journal.pcbi.1002936 (PMC3591270; doi:10.1371/journal.pcbi.1002936)
Supplement: Table S2 — RNA-seq and qPCR log2 ratios relative to the time zero controls for all 19 genes. See Materials and Methods for details. (XLSX) [file pcbi.1002936.s008.xlsx]

## Sheet: Sheet1
Log2 ratios of RNA-seq and qPCR data relative to the zero hour control.
RNA-Seq log 2 ratios
	3hr	6hr	12hr	1d	3d	5d	7d	10d	14d	21d	28d
ATF3	5.48428	4.19984	1.26469	2.31531	0	0	0	0	0	2.60275	1.28344
CDH6	0.0392032	0.0844653	-0.332254	-0.564557	-0.17301	1.25723	2.8355	3.37807	2.93607	0.8192	0.56305
EGR1	4.28004	3.94321	2.05257	1.30086	0.134021	-0.707129	0.0160787	-0.334977	-1.19613	0.962616	0.120374
FOS	6.99017	5.0993	2.8561	3.37836	1.82823	2.046	1.76626	0.542817	-0.939371	1.94738	-0.0603919
GLI3	-0.124804	-0.0602008	0.174027	-0.0649328	0.641669	0.476171	1.12064	2.60108	2.74133	0.6541	0.427946
HIF3A	1.34237	3.06858	2.57058	2.13349	-0.234249	-0.0630092	-1.44247	0.7346	0.689466	0.148973	-0.43586
HMGA2	-0.284049	-0.161307	0.209741	0.427383	0.92007	0.850899	1.19171	1.99987	2.26265	0.94964	0.443233
HOXD10	0.36177	-0.149279	-0.462863	-0.484261	0.572108	2.678	3.66336	4.03519	2.21579	1.19522	0.609012
JUND	2.7171	3.11504	1.76456	1.81466	0.548757	0.413523	0.544886	0.444628	0.035673	1.14906	0.636769
KLF4	3.11625	3.2663	1.51969	0.763104	-0.161247	0.0896548	-1.99893	-0.942211	-0.819212	1.53935	0.899056
LMO1	-1.1786	-1.1786	0.279116	0.397172	0.588356	0.419475	1.43186	1.7058	3.05113	1.41953	0.565653
MECOM	-0.0617062	0.0959313	-0.503449	-0.200122	0.416472	2.42183	3.9318	5.46643	5.15909	2.89265	1.4906
NR4A2	4.66638	3.85346	2.17695	1.30908	0.0960112	-0.625634	-0.0428289	-0.318877	-0.431858	1.41034	0.685962
PRRX1	-0.861898	-0.544066	-0.698951	-0.771944	1.88658	2.7658	3.23186	3.77123	3.1575	1.34714	0.965889
SALL1	0.112701	0.366208	0.666347	0.724436	1.35448	1.80926	3.59283	4.66056	4.51907	2.25646	1.26109
SALL3	0.119591	0	0	0	0.22977	0.390119	1.04724	1.7143	2.81732	0	0.348814
SALL4	0	0.957855	0.525617	2.27049	2.43809	2.81175	3.28072	2.3266	1.85885	0.136688	0
SHH	0	0	0	0	0	0	2.98706	4.19989	3.23686	0	0
TNN	0.160755	0.0954439	0	0.170712	0.0912782	0.21946	0.637404	2.35255	3.23935	0.929434	0.493318
qPCR log 2 ratios
	3hr	6hr	12hr	1d	3d	5d	7d	10d	14d	21d	28d
ATF3	14.9059	9.14141	5.14568	2.56737	-2.75565	-1.84831	3.22275	2.54637	4.05707	4.22705	4.01671
CDH6	-1.69396	0.084972	-0.117003	-1.21851	-3.04474	-0.956271	2.09657	4.10357	5.9522	4.85394	2.65627
EGR1	7.83875	3.431	1.93081	-0.0920611	-1.34548	-1.3826	1.32984	1.54694	2.03133	1.27059	1.22146
FOS	11.1588	6.31857	2.49609	3.46879	1.77401	2.82174	3.79636	4.18556	2.85938	3.54224	3.38733
GLI3	2.22596	0.44531	-0.498838	-1.80699	-2.61211	-0.3397	1.59627	2.95697	4.14979	3.85224	2.09085
HIF3A	3.91467	3.09433	2.427	0.381001	-1.44267	-2.84533	0.673	0.785667	3.08233	2.61967	0.046334
HMGA2	-1.578	1.52863	0.969391	2.413	0.45739	0.181133	2.26346	3.04662	4.80168	5.19953	2.62025
HOXD10	-1.13196	0.427367	-0.099394	-0.997235	-0.530176	2.67576	5.61979	6.7555	7.58318	6.47053	3.80058
JUND	6.95661	4.44272	4.29788	2.50578	1.08346	1.77729	4.6293	5.3569	5.17722	6.41245	4.61366
KLF4	4.24877	1.89207	1.44851	-1.23564	-2.42856	-1.52183	2.36562	1.05564	1.02102	1.71903	1.07893
LMO1	-2.8293	-3.32193	-2.4872	-4.29063	-3.77236	-1.73964	-0.993045	-0.699096	2.87661	2.79246	-0.0299471
MECOM	-2.2513	1.13261	0.0461751	-0.963159	-0.982802	0.320853	0.930186	3.18289	5.42113	6.19464	3.96154
NR4A2	6.32785	3.33571	2.85326	0.563232	-1.06387	-1.25238	2.51349	2.66135	2.9374	3.33027	2.19993
PRRX1	-3.32193	0.634376	-1.11199	-0.907893	-0.9091	0.321686	3.13372	3.33205	5.03965	3.93007	2.5211
SALL1	-3.32193	2.78172	1.72856	1.47516	0.757042	3.68892	2.70748	5.76005	7.64472	7.25561	5.55195
SALL3	5.19455	0.298539	-0.752636	-1.00656	-0.238362	3.48965	3.90384	4.05672	7.59619	6.84845	3.94589
SALL4	-3.32193	-0.318892	-1.61327	1.13493	0.320951	3.57027	4.54802	4.89322	4.75757	2.98913	0.253121
SHH	0.279038	1.67597	1.03488	-0.105713	-3.72163	-3.32193	1.24637	3.0452	5.0801	4.36413	-3.32193
TNN	5.19455	0.298539	-0.752636	0.551982	0.895924	1.35897	1.14303	3.97394	6.63045	7.49128	4.90188
