# Supplementary material for: Comparative RNA-seq Analysis in the Unsequenced Axolotl: The Oncogene Burst Highlights Early Gene Expression in the Blastema
Source: PLoS Comput Biol. 2013 Mar 7;9(3):e1002936. doi: 10.1371/journal.pcbi.1002936 (PMC3591270; doi:10.1371/journal.pcbi.1002936)
Supplement: Table S4 — The −log10(GO term FDR) numbers for the heat map of Figure 6 . (XLSX) [file pcbi.1002936.s010.xlsx]

## Sheet: Sheet1
Table S4.
Category|Term	3hr	6hr	12hr	1d	3d	5d	7d	10d	14d	21d	28d
BP|GO:0009888~tissue development							2.78678	3.95345	2.67758
MF|GO:0003810~protein-glutamine gamma-glutamyltransferase activity					3.54937		2.06177	2.3976	2.05201
BP|GO:0006935~chemotaxis		2.61758	3.27786	4.37454	2.17871		2.00564
BP|GO:0030003~cellular cation homeostasis				2.95841	2.1355
MF|GO:0005509~calcium ion binding				3.34754	7.43509	3.98819	4.49416	4.01699
MF|GO:0004175~endopeptidase activity	3.99608	4.8221	4.18211	3.30818	3.02113	3.82957	4.85938	2.03239
BP|GO:0035108~limb morphogenesis							2.96594	2.8666	3.51241
BP|GO:0035113~embryonic appendage morphogenesis							3.37482	3.23402	3.97278
BP|GO:0030574~collagen catabolic process	6.00619	10.0622	9.79464	6.55087	8.52083	7.04708	6.63697	4.1173
BP|GO:0030326~embryonic limb morphogenesis							3.37482	3.23402	3.97278
BP|GO:0001525~angiogenesis		5.28362	3.2118	2.36137
BP|GO:0030728~ovulation		2.24985	2.14895
MF|GO:0008237~metallopeptidase activity	2.32302	3.67268	3.23478		2.66891	3.26182	4.08561	2.27955
BP|GO:0045765~regulation of angiogenesis		2.38593	2.23085
BP|GO:0001568~blood vessel development		5.21317	2.65861	3.20288
BP|GO:0050801~ion homeostasis			2.08107	2.225
BP|GO:0001944~vasculature development		5.94404	2.59474	3.61128
BP|GO:0007398~ectoderm development											2.16326
BP|GO:0032103~positive regulation of response to external stimulus		2.23232		2.39221	3.1612
BP|GO:0008284~positive regulation of cell proliferation		2.74693	2.41673	4.54338			2.52979
BP|GO:0043627~response to estrogen stimulus			2.66961
BP|GO:0032570~response to progesterone stimulus			2.7986
BP|GO:0032496~response to lipopolysaccharide			2.70967
BP|GO:0002237~response to molecule of bacterial origin	2.88171		2.42772
BP|GO:0048754~branching morphogenesis of a tube								2.55319
BP|GO:0048705~skeletal system morphogenesis								2.58365
BP|GO:0050778~positive regulation of immune response					3.46216
BP|GO:0050766~positive regulation of phagocytosis					2.19556
BP|GO:0050764~regulation of phagocytosis					2.88851
BP|GO:0007166~cell surface receptor linked signal transduction					2.18263
BP|GO:0002253~activation of immune response					2.15889
BP|GO:0060429~epithelium development									2.03011
BP|GO:0030900~forebrain development									2.82227
BP|GO:0001658~branching involved in ureteric bud morphogenesis									2.35436
BP|GO:0001656~metanephros development									3.13088
BP|GO:0002526~acute inflammatory response				2.37956
BP|GO:0002694~regulation of leukocyte activation				3.84067			2.12093
BP|GO:0002703~regulation of leukocyte mediated immunity				2.48552
BP|GO:0002819~regulation of adaptive immune response				2.48552
BP|GO:0002822~regulation of adaptive immune response based on somatic recombination of immune receptors built from immunoglobulin superfamily domains				2.58127
BP|GO:0007584~response to nutrient				2.07962
BP|GO:0008285~negative regulation of cell proliferation				2.45928
BP|GO:0032944~regulation of mononuclear cell proliferation				2.62846			2.26638
BP|GO:0042554~superoxide anion generation				2.31995
BP|GO:0048661~positive regulation of smooth muscle cell proliferation				2.00333
BP|GO:0050670~regulation of lymphocyte proliferation				2.62846			2.26638
BP|GO:0070663~regulation of leukocyte proliferation				2.62846			2.26638
MF|GO:0004252~serine-type endopeptidase activity				2.43674
BP|GO:0050921~positive regulation of chemotaxis		2.61731
BP|GO:0050920~regulation of chemotaxis		2.61731
BP|GO:0048520~positive regulation of behavior		2.61731
BP|GO:0048514~blood vessel morphogenesis		4.40257		2.13243
BP|GO:0031328~positive regulation of cellular biosynthetic process		2.07908
BP|GO:0030334~regulation of cell migration		2.0265
BP|GO:0030193~regulation of blood coagulation		2.93025
BP|GO:0009891~positive regulation of biosynthetic process		2.03693
MF|GO:0016175~superoxide-generating NADPH oxidase activity				2.43704	3.15566		3.17438
BP|GO:0060348~bone development					3.28345	4.40345	5.52042	7.67144	2.10806
