# Supplementary material for: Comparative RNA-seq Analysis in the Unsequenced Axolotl: The Oncogene Burst Highlights Early Gene Expression in the Blastema
Source: PLoS Comput Biol. 2013 Mar 7;9(3):e1002936. doi: 10.1371/journal.pcbi.1002936 (PMC3591270; doi:10.1371/journal.pcbi.1002936)
Supplement: Table S5 — Primer sequences used in qPCR experiments. (XLSX) [file pcbi.1002936.s011.xlsx]

## Sheet: Sheet1
Table S5.
Gene	Oligo Name	Oligo length(nt)	Oligo sequence
GAPDH	GAPDH Probe	26	TTT GGC TAC AGT CAG CGT GTT GTG GA
	GAPDH Reverse Primer	24	TCT ATT CCT TGC TGG CCA TGT GGA
	GAPDH Forward Primer	24	GGC ATT GCC CTC AAC GAT CAC TTT
KLF4	KLF4 Probe	23	TTC CAC CCA CTG CCA CCA GTT TA
	KLF4 Reverse Primer	24	TCC GGC TGG AAT GAC GAG AAG TTT
	KLF4 Forward Primer	25	ATC TCA GGG TCT AAG CCA TCC TCC A
ATF3	ATF3 Probe	25	AGA ACC GGT GTC TTT CTG GCC GAA T
	ATF3 Reverse Primer	24	ACA GGT GCA TAC TCG GAT TTC AGC
	ATF3 Forward Primer	24	GGT GAA GGA AGA ACT GAG GTT TGC
NR4A2	NR4A2 Probe	25	ACA TCT CTG CCA CCA CCT CCT TGC C
	NR4A2 Reverse Primer	24	AGT GTA GCT GTC CAT GAA GGT GCT
	NR4A2 Forward Primer	24	ATT GCA ATG GAC CTG GTC AAC ACG
EGR1	EGR1 Probe	26	ACC ACT TGA CCA CTC ACA TAC GCA CA
	EGR1 Reverse Primer	24	CAC AAA TGT CAC AAG CGA AGG GCT
	EGR1 Forward Primer	24	ATG CAT GAG GAA TTT CAG CCG CAG
JUND	JUND Probe	28	AAG TCA ACG TAG GTG CAC CTC TTG GCA T
	JUND Reverse Primer	24	AAG GCA TTG CAT CTG GGT CCT TTG
	JUND Forward Primer	24	AGT GCG AGG TCT TGT TTC ACT CCA
FOS	FOS Probe	26	ATG GCC CAC CTC AGT ATT CTG GTG CT
	FOS Reverse Primer	24	CCA GCT GCG AGC AAC AAA GTC AAT
	FOS Forward Primer	24	CAT GCG TTG GCC AAA TCA GAC AGT
HIF3A	HIF3A Probe	25	AAC CCA CAA AGC CTG CAT CCG AGA A
	HIF3A Reverse Primer	24	ACA GTC TCG GAG TTT GGC TTC ACA
	HIF3A Forward Primer	24	TGT CGC TGG AGC AGA CAG AAA GTA
SAL1	SAL1 Probe	26	TCC GCT CTG TGA AGA GAA GCA GCA AA
	SAL1 Reverse Primer	24	GGC CAT TGG CAA ACT CAT GCG ATA
	SAL1 Forward Primer	24	GCT TTG TCA CCA TCC AAC AGC ACA
SALL3	SALL3 Probe	26	CCA CCA TCC GTC ATC TCC AGC ATT
	SALL3 Reverse Primer	24	ATC ATT CGC ATC TGG TTC TCT AA
	SALL3 Forward Primer	24	ATC CTC CAA GCC TTT CAT ATC C
SALL4	SALL4 Probe	26	ACT CGC AGA CAT TAA GCC GGT GTT GT
	SALL4 Reverse Primer	24	AGA TGG TCT GGA CTG CAC ATT GGT
	SALL4 Forward Primer	24	TTA TGG CAT GTC GGT GCC CTT AGA
LMO1	LMO1 Probe	25	AGA GCC CGG AGA TGA TGG TAC TGG A
	LMO1 Reverse Primer	24	AAA GTT GCA CTT GCG TCC TCC TTG
	LMO1 Forward Primer	24	TGC TCC CGG ACA ATT TGC TGT AGT
PRRX1	PRRX1 Probe	26	ACA CTT GTG CAC TTC CTG CAT TAC GA
	PRRX1 Reverse Primer	24	CGT GAT TGG ATT CAC CCT GCG TTT
	PRRX1 Forward Primer	24	TAC AAA GGA ACC AAG TGC CAA CGG
HOXD10	HOXD10 Probe	26	ACC AAA GCA TGG GCA TGA ACG CAC AT
	HOXD10 Reverse Primer	24	TGT AAC AGG TTG CTC TAT CCG GCA
	HOXD10 Forward Primer	24	ATG GAA TGC AAA CCT GTG GAC TGC
MECOM	MECOM Probe	28	CCA CTA GAT GAT GTC TAA GGC ACC CAC A
	MECOM Reverse Primer	22	CCA ATC ACC GTG TGA CTT GTG A
	MECOM Forward Primer	22	TCT GAT AGC ACT GTT CTA GCC C
GLI3	GLI3 Probe	28	AGG GAG TGG TGC TGG AAG ATC CAA TCA A
	GLI3 Reverse Primer	24	TGG TGT GTG ATG GGA CAT TAG CCT
	GLI3 Forward Primer	24	GCA TGA GCA TCT TGC AAC TCA GCA
HMGA2	HMGA2 Probe	26	TGC TAC ACA CGT ACA GTG CCG AAA CA
	HMGA2 Reverse Primer	24	AGG TAA GTT TAC CCG CCC GAA TGA
	HMGA2 Forward Primer	24	TGC CTT TCA TCT GTC CTG GTC CTT
SHH	SHH Probe	26	AAA GTC CAG CTG AAA GCC CAC CTC TT
	SHH Reverse Primer	24	TGT CTT TGA GTC TTT CTC CGG CCA
	SHH Forward Primer	24	TGC ACT GGT ACT CGG AAA TCC TCT
TNN	TNN Probe	25	AGC AGT ATT CTT ACC TGG GCA CCG
	TNN Reverse Primer	24	GGC CAG GAT ATA GCC ATC AAT C
	TNN Forward Primer	24	CAG AAA TCG ACC CTC CAA AGA A
CDH6	CDH6 Probe	26	AGA CAG CAT GAA GAG CGG AAG GTT GA
	CDH6 Reverse Primer	24	AGT GGG ACG TGA GCT GAA AGA ACA
	CDH6 Forward Primer	24	GCC ACA CCT TAA CCA AGC CAG TTT
